# Supplementary material for: Analysis and compensation for errors in electrical impedance tomography images and ventilation-related measures due to serial data collection
Source: Springer Nature journal article supplement (doi:10.1007/s10877-016-9920-y), 2016-08-17
Supplement: MOESM2 [file 10592310]

# Online material 1

Tables relating to:

Analysis and compensation for errors in electrical impedance tomography images and ventilation-related measures due to serial data collection.

Submitted to Journal of Clinical Monitoring and Computing (JCMC)

Authors: Rebecca J. Yerworth, Inéz Frerichs, and Richard Bayford

TABLE 1  
SPONTANEOUSLY BREATHING NEONATES

|       | FI: mean diff |        |        |        | $\Delta Z$ : mean diff (arbitrary units) |        |         |         | FF: mean diff |        |        |        | no. breaths |
|-------|---------------|--------|--------|--------|------------------------------------------|--------|---------|---------|---------------|--------|--------|--------|-------------|
|       | LA            | LP     | RP     | RA     | LA                                       | LP     | RP      | RA      | LA            | LP     | RP     | RA     |             |
| 1     | 0.163         | 0.060  | -0.105 | -0.160 | -2.702                                   | 4.248  | -0.085  | -2.714  | -0.005        | 0.009  | 0.001  | -0.006 | 7           |
| 2     | 0.109         | 0.066  | -0.055 | -0.072 | -1.271                                   | -1.198 | -1.591  | -6.341  | 0.007         | 0.003  | 0.002  | -0.012 | 47          |
| 3     | 0.027         | -0.024 | 0.006  | -0.067 | -3.557                                   | -6.267 | -13.338 | -8.841  | 0.010         | 0.002  | -0.009 | -0.004 | 10          |
| 4     | 0.262         | 0.040  | -0.091 | -0.177 | 1.201                                    | 0.661  | -2.191  | -1.086  | 0.007         | 0.005  | -0.008 | -0.004 | 23          |
| 5     | 0.082         | 0.028  | -0.010 | -0.125 | -4.331                                   | -3.091 | -15.099 | -11.692 | 0.007         | 0.012  | -0.008 | -0.011 | 8           |
| 6     | 0.004         | 0.095  | -0.007 | 0.000  | -3.236                                   | 1.839  | -2.308  | 3.279   | -0.008        | 0.004  | -0.005 | 0.009  | 5           |
| 7     | 0.123         | 0.067  | -0.030 | -0.150 | -0.179                                   | -1.007 | 0.017   | -0.780  | 0.001         | 0.000  | 0.000  | -0.001 | 11          |
| 8     | 0.174         | 0.053  | -0.061 | -0.027 | -5.202                                   | -0.763 | -3.934  | -4.032  | -0.008        | 0.009  | 0.004  | -0.004 | 26          |
| 9     | -0.017        | 0.029  | -0.013 | -0.097 | -2.492                                   | 4.170  | 0.836   | 0.742   | -0.010        | 0.009  | 0.000  | 0.001  | 16          |
| 10    | 0.238         | -0.192 | 0.185  | -0.217 | -6.131                                   | 2.164  | -8.091  | 1.988   | -0.008        | 0.017  | -0.018 | 0.009  | 13          |
| 11    | 0.125         | 0.0264 | -0.027 | -0.193 | -0.653                                   | -0.918 | -1.541  | -0.657  | 0.001         | 0.000  | -0.002 | 0.001  | 26          |
| 12    | 0.163         | 0.049  | -0.081 | -0.057 | 2.083                                    | -1.205 | 0.553   | 0.257   | 0.005         | -0.003 | 0.002  | -0.004 | 7           |
| 13    | -0.017        | -0.001 | -0.068 | -0.150 | -4.556                                   | 0.897  | 5.552   | -3.177  | -0.011        | 0.005  | 0.015  | -0.009 | 5           |
| 14    | 0.060         | 0.161  | -0.064 | -0.196 | -3.074                                   | -2.414 | -3.952  | -5.610  | -0.002        | 0.005  | 0.003  | -0.005 | 15          |
| 15    | 0.055         | 0.173  | -0.055 | -0.149 | -0.323                                   | -3.518 | -4.778  | -2.611  | 0.005         | -0.003 | -0.001 | -0.001 | 12          |
| 16    | 0.100         | 0.045  | -0.047 | -0.177 | -8.960                                   | 3.470  | 5.950   | 1.605   | -0.024        | 0.008  | 0.012  | 0.004  | 7           |
| 17    | 0.067         | 0.047  | -0.120 | -0.109 | 2.022                                    | -2.724 | 0.390   | 0.203   | 0.006         | -0.008 | 0.002  | 0.000  | 3           |
| 18    | -0.191        | 0.078  | 0.026  | 0.018  | 8.599                                    | 2.014  | -6.656  | -5.235  | 0.072         | 0.026  | -0.051 | -0.047 | 16          |
| 19    | 0.208         | -0.161 | 0.007  | -0.013 | 12.704                                   | 7.951  | 0.688   | 5.324   | 0.035         | -0.011 | -0.039 | 0.015  | 5           |
| mean  | 0.091         | 0.034  | -0.032 | -0.111 | -1.056                                   | 0.227  | -2.609  | -2.072  | 0.004         | 0.005  | -0.005 | -0.004 | 14          |
| stdev | 0.106         | 0.088  | 0.066  | 0.072  | 5.037                                    | 3.357  | 5.391   | 4.225   | 0.020         | 0.009  | 0.016  | 0.012  | 10.7        |

Change in clinical parameters filling index (FI), impedance change ( $\Delta Z$ ) and filling fraction (FF) due to correction for serial data collection for 19 mechanically ventilated infants. LA: left anterior; RA: right anterior; LP: left posterior; RP: right posterior.

Light shading, black font:  $p < 0.05$ ; light shading white font:  $p < 0.01$ ; dark shading with white font:  $p < 0.001$ .

TABLE 2  
MECHANICALLY VENTILATED NEONATES

|       | FI: mean diff |       |        |        | $\Delta Z$ : mean diff (arbitrary units) |        |       |       | FF: mean diff |       |       |       | no.     |
|-------|---------------|-------|--------|--------|------------------------------------------|--------|-------|-------|---------------|-------|-------|-------|---------|
|       | LA            | LP    | RP     | RA     | LA                                       | LP     | RP    | RA    | LA            | LP    | RP    | RA    | breaths |
| 15    | 0.046         | 0.018 | -0.048 | -0.019 | -4.627                                   | 0.917  | 0.179 | 0.038 | -0.003        | 0.001 | 0.001 | 0.001 | 9       |
| 16    | 0.101         | 0.080 | -0.096 | -0.056 | -3.477                                   | -0.333 | 0.559 | 1.109 | -0.007        | 0.001 | 0.002 | 0.004 | 24      |
| 17    | 0.150         | 0.038 | -0.119 | -0.074 | -1.684                                   | 0.238  | 1.423 | 1.504 | -0.005        | 0.000 | 0.002 | 0.003 | 15      |
| 18    | 0.073         | 0.040 | -0.082 | -0.038 | -3.045                                   | -0.270 | 1.500 | 0.347 | -0.006        | 0.000 | 0.004 | 0.002 | 27      |
| mean  | 0.09          | 0.04  | -0.09  | -0.05  | -3.21                                    | 0.14   | 0.92  | 0.75  | -0.005        | 0.000 | 0.002 | 0.002 | 18.75   |
| stdev | 0.04          | 0.03  | 0.03   | 0.02   | 1.22                                     | 0.58   | 0.65  | 0.67  | 0.002         | 0.001 | 0.001 | 0.001 | 8.26136 |

Change in clinical parameters filling index (FI), impedance change ( $\Delta Z$ ) and filling fraction (FF) due to correction for serial data collection for 4 mechanically ventilated infants. LA: left anterior; RA: right anterior; LP: left posterior; RP: right posterior.

Light shading, black font:  $p < 0.05$ ; light shading white font:  $p < 0.01$ ; dark shading with white font:  $p < 0.001$ .

TABLE 3  
OTHER DATA SETS

|    | FI: mean diff |       |        |        | $\Delta Z$ : mean diff (arbitrary units) |        |        |        | FF: mean diff |        |        |        | no.     |
|----|---------------|-------|--------|--------|------------------------------------------|--------|--------|--------|---------------|--------|--------|--------|---------|
|    | LA            | LP    | RP     | RA     | LA                                       | LP     | RP     | RA     | LA            | LP     | RP     | RA     | breaths |
| P1 | 0.166         | 0.016 | -0.035 | -0.118 | 2.252                                    | -3.761 | -1.614 | 5.356  | 0.003         | -0.007 | -0.003 | 0.007  | 42      |
| N1 | 0.127         | 0.142 | -0.081 | -0.167 | 0.276                                    | -3.086 | -1.149 | -0.942 | 0.006         | -0.006 | 0.000  | 0.000  | 58      |
| N2 | 0.155         | 0.118 | -0.086 | -0.213 | -3.777                                   | -2.348 | 0.608  | 1.030  | -0.015        | -0.003 | 0.010  | 0.008  | 12      |
| A1 | 0.026         | 0.020 | -0.014 | -0.059 | -1.619                                   | 1.646  | 0.736  | -1.103 | -0.003        | 0.003  | 0.001  | -0.001 | 11      |
| A2 | 0.020         | 0.015 | -0.012 | -0.019 | 1.546                                    | 0.895  | -0.250 | 0.552  | 0.001         | 0.000  | -0.002 | 0.000  | 10      |
| A3 | 0.021         | 0.015 | -0.019 | -0.033 | 0.170                                    | -0.400 | -2.153 | -2.626 | 0.003         | 0.002  | -0.002 | -0.003 | 12      |
| A4 | 0.021         | 0.011 | -0.008 | -0.048 | -0.259                                   | -2.413 | -1.814 | -2.060 | 0.002         | 0.000  | 0.000  | -0.001 | 12      |
| A5 | 0.015         | 0.042 | 0.011  | 0.019  | 3.596                                    | 1.924  | -0.383 | 1.201  | 0.003         | 0.007  | -0.010 | 0.000  | 13      |
| P2 | -0.055        | 0.003 | -0.003 | -0.004 | -10.819                                  | -3.713 | -1.848 | -9.802 | -0.018        | 0.004  | 0.005  | 0.010  | 9       |
| P3 | 0.131         | 0.099 | -0.082 | 0.024  | 7.701                                    | -0.204 | -1.815 | -2.672 | 0.030         | -0.002 | -0.008 | -0.019 | 8       |

Change in clinical parameters filling index (FI), impedance change ( $\Delta Z$ ) and filling fraction (FF) due to correction for serial data collection for 3 pigs (P1 [18], P2 & P3 [19]), mechanically ventilated; one spontaneously breathing infant (N1, N2); and one spontaneously breathing adult in a range of postures (sitting (A1,A2), lying on right side (A3), supine (A4,A5)[17]). LA: left anterior; RA: right anterior; LP: left posterior; RP: right posterior.

Light shading, black font:  $p < 0.05$ ; light shading white font:  $p < 0.01$ ; dark shading with white font:  $p < 0.001$ .
